# Supplementary material for: Occupational differences in disability retirement due to a shoulder lesion: do work-related factors matter?
Source: Springer Nature journal article supplement (doi:10.1007/s00420-020-01549-y), 2020-05-04
Supplement: MOESM1 [file 17952484]

## **Supplementary tables 1A and 1B.**

Occupational differences in disability retirement due to a shoulder lesion: do work-related factors matter?

*International Archives of Occupational and Environmental Health*

Maria Sirén, MD

Helsinki University Hospital, Department of Physical and Rehabilitation Medicine

University of Helsinki, Helsinki, Finland

maria.siren@hus.fi

Eira Viikari-Juntura, MD, PhD

Finnish Institute of Occupational Health, Helsinki, Finland

Jari Arokoski, MD, PhD

Helsinki University Hospital, Department of Physical and Rehabilitation Medicine, Helsinki, Finland

University of Helsinki, Helsinki, Finland

Svetlana Solovieva, PhD

Finnish Institute of Occupational Health, Helsinki, Finland

Supplementary table 1A. Hazard ratios (HR) and 95% confidence intervals (CI) of full time disability retirement due to a shoulder lesion in 2005-2014 among 30-60-year-old men by occupational group. Reference group - professionals.

| Occupational group                                                       | Model 1 |           | Model 2 |           | PRE <sup>1</sup> | Model 3 |           |                  | Model 4 |           |                   | Model 5 |           |                  |
|--------------------------------------------------------------------------|---------|-----------|---------|-----------|------------------|---------|-----------|------------------|---------|-----------|-------------------|---------|-----------|------------------|
|                                                                          | HR      | 95% CI    | HR      | 95% CI    |                  | HR      | 95% CI    | PRE <sup>2</sup> | HR      | 95% CI    | PRE <sup>3</sup>  | HR      | 95% CI    | PRE <sup>4</sup> |
| Managers                                                                 | 0.49    | 0.27-1.45 | 0.43    | 0.15-1.25 | N/A <sup>5</sup> | 0.39    | 0.13-1.15 | N/A              | 0.41    | 0.14-1.19 | N/A               | 0.39    | 0.13-1.15 | N/A              |
| Professionals                                                            | 1.00    |           | 1.00    |           |                  | 1.00    |           |                  | 1.00    |           |                   | 1.00    |           |                  |
| Physical and engineering science technicians                             | 4.06    | 2.37-6.94 | 2.38    | 1.39-4.08 | 54.9             | 2.14    | 1.23-3.70 | 17.4             | 2.33    | 1.36-4.00 | 3.6               | 2.14    | 1.23-3.70 | 17.4             |
| Environmental officers and nurses                                        | 8.33    | 3.67-18.9 | 5.14    | 2.24-11.8 | 43.5             | 4.38    | 1.87-10.2 | 18.4             | 4.65    | 2.02-10.7 | 11.8              | 4.35    | 1.85-10.2 | 19.1             |
| Finance and sales associate professionals and administrative secretaries | 3.77    | 2.19-6.47 | 1.91    | 1.10-3.30 | 67.1             | 1.71    | 0.99-2.97 | 22.0             | 1.88    | 1.08-3.28 | 3.3               | 1.71    | 0.98-3.00 | 22.0             |
| Office clerks                                                            | 10.8    | 6.31-18.5 | 4.52    | 2.62-7.80 | 64.1             | 2.78    | 1.57-4.93 | 49.4             | 4.00    | 2.28-7.01 | 14.8              | 2.66    | 1.46-4.80 | 52.8             |
| Customer services clerks                                                 | 4.51    | 0.60-33.6 | 2.25    | 0.30-16.8 | N/A              | 2.26    | 0.30-16.9 | N/A              | 2.23    | 0.30-16.6 | N/A               | 2.24    | 0.30-16.7 | N/A              |
| Service workers                                                          | 16.4    | 9.81-27.4 | 6.41    | 3.78-10.9 | 64.9             | 3.59    | 2.04-6.30 | 52.1             | 6.06    | 3.55-10.3 | 6.5               | 3.69    | 2.09-6.51 | 50.3             |
| Shop workers                                                             | 11.7    | 6.55-21.0 | 4.63    | 2.55-8.39 | 66.1             | 3.12    | 1.67-5.86 | 41.6             | 3.91    | 2.11-7.24 | 19.8              | 3.06    | 1.60-5.83 | 43.3             |
| Agricultural and fishery workers                                         | 13.4    | 8.33-21.5 | 5.03    | 3.07-8.23 | 67.5             | 1.70    | 0.86-3.33 | 82.6             | 5.26    | 3.14-8.83 | -5.7 <sup>6</sup> | 1.88    | 0.95-3.74 | 78.2             |
| Construction workers. electricians and plumbers                          | 32.5    | 20.7-51.2 | 11.8    | 7.39-19.0 | 65.7             | 3.33    | 1.59-6.99 | 78.4             | 10.3    | 6.38-16.5 | 14.1              | 3.75    | 1.76-8.00 | 74.5             |
| Metal and machinery workers                                              | 21.0    | 13.4-33.2 | 7.82    | 4.87-12.6 | 65.9             | 4.20    | 2.27-7.80 | 53.1             | 7.92    | 4.83-13.0 | -1.5              | 4.59    | 2.45-8.57 | 47.4             |
| Craft workers                                                            | 16.1    | 9.35-27.8 | 6.29    | 3.61-11.0 | 65.0             | 3.50    | 1.85-6.60 | 52.7             | 5.56    | 3.13-9.87 | 13.8              | 3.44    | 1.79-6.61 | 53.9             |
| Chemical. wood and metal processing workers                              | 21.6    | 13.2-35.3 | 7.87    | 4.74-13.1 | 66.7             | 4.70    | 2.64-8.35 | 46.1             | 7.03    | 4.05-12.2 | 12.2              | 4.48    | 2.46-8.16 | 49.3             |
| Machine operators and assemblers                                         | 19.3    | 11.9-31.4 | 7.08    | 4.28-11.7 | 66.8             | 4.28    | 2.40-7.63 | 46.1             | 5.37    | 3.08-9.36 | 28.1              | 3.78    | 2.06-6.93 | 54.3             |
| Professional drivers                                                     | 14.7    | 9.19-23.4 | 5.27    | 3.24-8.57 | 68.8             | 3.46    | 2.05-5.84 | 42.4             | 3.17    | 1.84-5.49 | 49.2              | 2.77    | 1.57-4.88 | 58.5             |
| Building caretakers. cleaners. assistant nurses and kitchen workers      | 20.9    | 12.8-34.3 | 7.72    | 4.63-12.9 | 66.2             | 4.05    | 2.30-7.13 | 54.6             | 7.28    | 4.25-12.4 | 6.5               | 4.12    | 2.32-7.34 | 53.6             |
| Unskilled transport. construction and manufacturing workers              | 23.7    | 14.5-38.6 | 8.61    | 5.20-14.3 | 66.5             | 3.73    | 2.04-6.84 | 64.1             | 6.33    | 3.58-11.2 | 30.0              | 3.30    | 1.75-6.23 | 69.8             |

Model 1: Adjusted for age, Model 2: adjusted for age and education, Model 3: adjusted for age, education and physical work load factors (heavy lifting, working with hands above shoulder level, Work demanding high handgrip forces, awkward trunk posture and physically heavy work).; Model 4: adjusted for age, education and psychosocial work-related factors (high job demands, low job control and monotonous work).; Model 5: adjusted for age, education and physical and psychosocial work-related factors.

<sup>1</sup>PRE: percentage explained by education (%).<sup>2</sup>PRE: percentage explained by physical work load factors (%);<sup>3</sup>PRE: percentage explained by psychosocial work-related factors (%); <sup>4</sup>PRE: percentage explained by physical and psychosocial work-related factors (%).

<sup>5</sup>N/A: not applicable. <sup>6</sup> Minus indicates an increase in HR after adjustment.

Supplementary table 1B. Hazard ratios (HR) and 95% confidence intervals (CI) of full time disability retirement due to a shoulder lesion in 2005-2014 among 30-60-year-old women by occupational group. Reference group - professionals.

| Occupational group                                                       | Model 1 |           | Model 2 |           | PRE <sup>1</sup> | Model 3 |           |                  | Model 4 |           |                   | Model 5 |           |                  |
|--------------------------------------------------------------------------|---------|-----------|---------|-----------|------------------|---------|-----------|------------------|---------|-----------|-------------------|---------|-----------|------------------|
|                                                                          | HR      | 95% CI    | HR      | 95% CI    |                  | HR      | 95% CI    | PRE <sup>2</sup> | HR      | 95% CI    | PRE <sup>3</sup>  | HR      | 95% CI    | PRE <sup>4</sup> |
| Managers                                                                 | 3.38    | 1.53-7.45 | 2.69    | 1.23-5.87 | 29.0             | 2.65    | 1.22-5.80 | 2.4              | 2.67    | 1.22-5.87 | 1.2               | 2.68    | 1.22-5.89 | 0.6              |
| Professionals                                                            | 1.00    |           | 1.00    |           |                  | 1.00    |           |                  | 1.00    |           |                   | 1.00    |           |                  |
| Physical and engineering science technicians                             | 4.01    | 1.57-10.2 | 1.49    | 0.58-3.87 | 83.7             | 1.53    | 0.59-3.99 | N/A <sup>5</sup> | 1.51    | 0.58-4.00 | N/A               | 1.65    | 0.63-4.34 | N/A              |
| Environmental officers and nurses                                        | 4.83    | 2.64-8.87 | 3.60    | 1.97-6.58 | 32.1             | 2.63    | 1.37-5.04 | 37.3             | 3.68    | 2.00-6.78 | -3.1 <sup>6</sup> | 2.95    | 1.53-5.69 | 25.0             |
| Finance and sales associate professionals and administrative secretaries | 3.59    | 2.02-6.37 | 1.44    | 0.81-2.56 | 83.0             | 1.41    | 0.79-2.51 | N/A              | 1.47    | 0.81-2.65 | N/A               | 1.55    | 0.86-2.81 | N/A              |
| Office clerks                                                            | 4.54    | 2.58-7.97 | 1.61    | 0.91-2.87 | 82.8             | 1.49    | 0.84-2.64 | N/A              | 1.55    | 0.85-2.82 | N/A               | 1.58    | 0.87-2.88 | N/A              |
| Customer services clerks                                                 | 3.15    | 1.46-6.79 | 1.05    | 0.48-2.29 | 97.7             | 1.10    | 0.50-2.41 | N/A              | 1.01    | 0.46-2.25 | N/A               | 1.23    | 0.55-2.76 | N/A              |
| Service workers                                                          | 16.6    | 10.0-27.5 | 4.79    | 2.83-8.11 | 75.7             | 2.89    | 1.61-5.17 | 50.1             | 4.59    | 2.69-7.84 | 5.3               | 3.14    | 1.75-5.61 | 43.5             |
| Shop workers                                                             | 17.7    | 10.3-30.3 | 4.83    | 2.77-8.42 | 77.1             | 3.47    | 1.95-6.19 | 35.5             | 4.80    | 2.75-8.37 | 0.8               | 3.36    | 1.89-5.99 | 38.4             |
| Agricultural and fishery workers                                         | 18.9    | 10.9-32.6 | 5.47    | 3.11-9.61 | 75.0             | 2.48    | 1.26-4.86 | 66.9             | 5.79    | 3.11-10.8 | -7.2              | 3.12    | 1.55-6.32 | 52.6             |
| Construction workers. electricians and plumbers                          | 13.1    | 4.79-35.7 | 3.68    | 1.34-10.1 | 77.9             | 1.23    | 0.39-3.86 | 91.4             | 3.91    | 1.38-11.0 | -8.6              | 1.64    | 0.51-5.20 | 76.1             |
| Metal and machinery workers                                              | 24.6    | 11.8-50.1 | 6.78    | 3.21-14.3 | 75.5             | 4.91    | 2.20-10.9 | 32.4             | 6.91    | 3.22-14.8 | -2.2              | 5.86    | 2.58-13.3 | 15.9             |
| Craft workers                                                            | 26.9    | 14.8-48.9 | 7.69    | 4.16-14.2 | 74.2             | 5.65    | 2.91-11.0 | 30.5             | 6.87    | 3.64-13.0 | 12.3              | 6.01    | 3.05-11.8 | 25.1             |
| Chemical. wood and metal processing workers                              | 30.7    | 16.2-58.1 | 8.03    | 4.17-15.5 | 76.3             | 4.91    | 2.42-9.95 | 44.4             | 5.50    | 2.74-11.1 | 36.0              | 4.37    | 2.13-8.96 | 52.1             |
| Machine operators and assemblers                                         | 21.3    | 12.4-36.8 | 5.57    | 3.17-9.81 | 77.5             | 3.28    | 1.75-6.15 | 50.1             | 4.01    | 2.18-7.39 | 34.1              | 3.20    | 1.69-6.06 | 51.9             |
| Professional drivers                                                     | 6.02    | 1.75-20.7 | 1.65    | 0.48-5.72 | 87.1             | 1.47    | 0.42-5.17 | N/A              | 1.52    | 0.43-5.32 | N/A               | 1.54    | 0.44-5.44 | N/A              |
| Building caretakers. cleaners. assistant nurses and kitchen workers      | 27.2    | 16.4-45.0 | 7.25    | 4.28-12.3 | 76.1             | 3.61    | 1.97-6.59 | 58.2             | 5.75    | 3.27-10.1 | 24.0              | 3.82    | 2.07-7.04 | 54.9             |
| Unskilled transport. construction and manufacturing workers              | 30.9    | 17.2-55.6 | 8.00    | 4.36-14.7 | 76.6             | 3.62    | 1.79-7.32 | 62.6             | 5.73    | 2.97-11.0 | 32.4              | 3.56    | 1.74-7.27 | 63.4             |

Model 1: Adjusted for age, Model 2: adjusted for age and education, Model 3: adjusted for age, education and physical work load factors (heavy lifting, working with hands above shoulder level, Work demanding high handgrip forces, awkward trunk posture and physically heavy work).; Model 4: adjusted for age, education and psychosocial work-related factors (high job demands, low job control and monotonous work).; Model 5: adjusted for age, education and physical and psychosocial work-related factors.  
<sup>1</sup>PRE: percentage explained by education (%).<sup>2</sup>PRE: percentage explained by physical work load factors (%);<sup>3</sup>PRE: percentage explained by psychosocial work-related factors (%);<sup>4</sup>PRE: percentage explained by physical and psychosocial work-related factors (%).

<sup>5</sup>N/A: not applicable. <sup>6</sup> Minus indicates an increase in HR after adjustment
