# Supplementary material for: Occupational differences in disability retirement due to a shoulder lesion: do work-related factors matter?
Source: Springer Nature journal article supplement (doi:10.1007/s00420-020-01549-y), 2020-05-04
Supplement: MOESM2 [file 17952484]

## **Supplementary tables 2A and 2B.**

Occupational differences in disability retirement due to a shoulder lesion: do work-related factors matter?

*International Archives of Occupational and Environmental Health*

Maria Sirén, MD

Helsinki University Hospital, Department of Physical and Rehabilitation Medicine

University of Helsinki, Helsinki, Finland

maria.siren@hus.fi

Eira Viikari-Juntura, MD, PhD

Finnish Institute of Occupational Health, Helsinki, Finland

Jari Arokoski, MD, PhD

Helsinki University Hospital, Department of Physical and Rehabilitation Medicine, Helsinki, Finland

University of Helsinki, Helsinki, Finland

Svetlana Solovieva, PhD

Finnish Institute of Occupational Health, Helsinki, Finland

Supplementary table 2A. Age adjusted hazard ratios (HR) of full time disability retirement due to a shoulder lesion in 2005-2014 and contribution of individual physical and psychosocial work-related factors to the excess risk of full time disability retirement due to a shoulder lesion in specific occupational groups as compared to professionals. 30-60-year-old men.

| Occupational groups                                                      | Model 1 | All physical factors | Heavy lifting    | Hands above shoulder level | High handgrip forces | Forward bent posture | Physically heavy work | All psychosocial factors | High job demands | Low job control  | Monotonous work  | All factors      |
|--------------------------------------------------------------------------|---------|----------------------|------------------|----------------------------|----------------------|----------------------|-----------------------|--------------------------|------------------|------------------|------------------|------------------|
|                                                                          | HR      | PRE <sup>1</sup>     | PRE <sup>2</sup> | PRE <sup>2</sup>           | PRE <sup>2</sup>     | PRE <sup>2</sup>     | PRE <sup>2</sup>      | PRE <sup>3</sup>         | PRE <sup>4</sup> | PRE <sup>4</sup> | PRE <sup>4</sup> | PRE <sup>5</sup> |
| Managers                                                                 | 0.49    | N/A <sup>6</sup>     | N/A              | N/A                        | N/A                  | N/A                  | N/A                   | N/A                      | N/A              | N/A              |                  | N/A              |
| Professionals                                                            | 1.00    |                      |                  |                            |                      |                      |                       |                          |                  |                  |                  |                  |
| Physical and engineering science technicians                             | 4.06    | 17.4                 | 18.8             | -3.6 <sup>7</sup>          | 7.2                  | 19.6                 | 21.7                  | 3.6                      | 3.6              | 1.4              | -0.7             | 17.4             |
| Environmental officers and nurses                                        | 8.33    | 18.4                 | 9.2              | 7.5                        | 5.1                  | 24.2                 | 16.4                  | 11.8                     | 11.8             | 0.7              | -0.2             | 19.1             |
| Finance and sales associate professionals and administrative secretaries | 3.77    | 22.0                 | 16.5             | -7.7                       | 5.5                  | 5.5                  | 27.5                  | 3.3                      | 3.3              | 4.4              | 0.0              | 22.0             |
| Office clerks                                                            | 10.8    | 49.4                 | 11.9             | 23.0                       | 1.4                  | 7.4                  | 44.0                  | 14.8                     | 2.3              | 5.1              | 13.9             | 52.8             |
| Customer services clerks                                                 | 4.51    | N/A                  | N/A              | N/A                        | N/A                  | N/A                  | N/A                   | N/A                      | N/A              | N/A              | N/A              | N/A              |
| Services workers                                                         | 16.4    | 52.1                 | 17.4             | 1.8                        | 2.2                  | 22.7                 | 51.9                  | 6.5                      | 0.9              | 2.2              | 5.0              | 50.3             |
| Shop workers                                                             | 11.7    | 41.6                 | 33.6             | 18.5                       | 10.2                 | 25.3                 | 43.0                  | 19.8                     | 19.8             | 5.2              | -0.6             | 43.3             |
| Agricultural and fishery workers                                         | 13.4    | 82.6                 | 57.3             | 26.3                       | 33.5                 | 54.6                 | 86.8                  | -5.7                     | -10.7            | 5.0              | 4.5              | 78.2             |
| Construction workers, electricians and plumbers                          | 32.5    | 78.4                 | 46.7             | 51.4                       | 32.1                 | 56.2                 | 77.8                  | 14.1                     | 14.2             | 0.6              | -0.9             | 74.5             |
| Metal and machinery workers                                              | 21.0    | 53.1                 | 25.2             | 34.5                       | 27.1                 | 48.7                 | 52.1                  | -1.5                     | -1.3             | 4.5              | -0.4             | 47.4             |
| Craft workers                                                            | 16.1    | 52.7                 | 24.8             | 16.8                       | 10.4                 | 51.4                 | 49.3                  | 13.8                     | -6.0             | 2.3              | 19.3             | 53.9             |
| Chemical, wood and metal processing workers                              | 21.6    | 46.1                 | 31.4             | 14.0                       | 16.4                 | 35.7                 | 48.9                  | 12.2                     | -9.8             | 4.5              | 20.2             | 49.3             |
| Machine operators and assemblers                                         | 19.3    | 46.1                 | 32.7             | 16.4                       | 19.2                 | 38.2                 | 49.0                  | 28.1                     | -3.9             | 4.8              | 31.6             | 54.3             |
| Professional drivers                                                     | 14.7    | 42.4                 | 32.3             | 6.3                        | 12.9                 | 13.8                 | 48.2                  | 49.2                     | 17.6             | 4.4              | 36.3             | 58.5             |
| Building caretakers, cleaners, assistant nurses and kitchen workers      | 20.9    | 54.6                 | 19.8             | 11.5                       | 16.1                 | 20.5                 | 56.4                  | 6.5                      | -5.1             | 4.6              | 9.8              | 53.6             |
| Unskilled transport, construction and manufacturing workers              | 23.7    | 64.1                 | 43.0             | 18.7                       | 21.9                 | 34.2                 | 81.1                  | 30.0                     | -5.4             | 4.6              | 33.6             | 69.8             |

Model 1: Adjusted for age.

<sup>1</sup>PRE – percentage explained (%) - the percentage of attenuation of HR (with professionals as reference) after adjustment for age, education and all physical work load factor.

<sup>2</sup>PRE – percentage explained (%) - the percentage of attenuation of HR (with professionals as reference) after adjustment for age, education and the physical work load factor in question;

<sup>3</sup>PRE – percentage explained (%) - the percentage of attenuation of HR (with professionals as reference) after adjustment for age, education and all psychosocial factors.

<sup>4</sup>PRE – percentage explained (%) - the percentage of attenuation of HR (with professionals as reference) after adjustment for age, education and the psychosocial factor in question.

<sup>5</sup>PRE – percentage explained (%) - the percentage of attenuation of HR (with professionals as reference) after adjustment for age, education and all physical psychosocial work-related factors.

<sup>6</sup>N/A: not applicable; <sup>7</sup> Minus indicates an increase in HR after adjustment.

Supplementary table 2B. Age adjusted hazard ratios (HR) of full time disability retirement due to a shoulder lesion in 2005-2014 and contribution of individual physical and psychosocial work-related factors to the excess risk of full time disability retirement due to a shoulder lesion in specific occupational groups as compared to professionals. 30-60-year-old women.

| Occupational groups                                                      | Model | All              | Heavy            | Hands             | High             | Forward          | Physically       | All              | High job         | Low              | Monotonous       | All              |
|--------------------------------------------------------------------------|-------|------------------|------------------|-------------------|------------------|------------------|------------------|------------------|------------------|------------------|------------------|------------------|
|                                                                          | 1     | physical         | lifting          | above             | handgrip         | bent posture     | heavy work       | psychosocial     | demands          | job              | work             | factors          |
|                                                                          | HR    | PRE <sup>1</sup> | PRE <sup>2</sup> | PRE <sup>2</sup>  | PRE <sup>2</sup> | PRE <sup>2</sup> | PRE <sup>2</sup> | PRE <sup>3</sup> | PRE <sup>4</sup> | PRE <sup>4</sup> | PRE <sup>4</sup> | PRE <sup>5</sup> |
| Managers                                                                 | 3.38  | 2.4              | 0.0              | -1.8 <sup>7</sup> | 0.0              | -0.6             | 4.7              | 1.2              | 8.3              | 0.0              | 4.7              | 0.6              |
| Professionals                                                            | 1.00  |                  |                  |                   |                  |                  |                  |                  |                  |                  |                  |                  |
| Physical and engineering science technicians                             | 4.01  | N/A              | N/A              | N/A               | N/A              | N/A              | N/A              | N/A              | N/A              | N/A              | N/A              | N/A              |
| Environmental officers and nurses                                        | 4.83  | 37.3             | -1.2             | 10.4              | 6.2              | 13.5             | 33.5             | -3.1             | 5.0              | 2.7              | 0.4              | 25.0             |
| Finance and sales associate professionals and administrative secretaries | 3.59  | N/A              | N/A              | N/A               | N/A              | N/A              | N/A              | N/A              | N/A              | N/A              | N/A              | N/A              |
| Office clerks                                                            | 4.54  | N/A              | N/A              | N/A               | N/A              | N/A              | N/A              | N/A              | N/A              | N/A              | N/A              | N/A              |
| Customer services clerks                                                 | 3.15  | N/A              | N/A              | N/A               | N/A              | N/A              | N/A              | N/A              | N/A              | N/A              | N/A              | N/A              |
| Services workers                                                         | 16.6  | 50.1             | -0.8             | 5.3               | 5.0              | 15.0             | 44.1             | 5.3              | -0.3             | 3.2              | 5.5              | 43.5             |
| Shop workers                                                             | 17.7  | 35.5             | -0.8             | 8.9               | 3.1              | 4.7              | 32.1             | 0.8              | -2.6             | -0.3             | -0.8             | 38.4             |
| Agricultural and fishery workers                                         | 18.9  | 66.9             | -2.5             | 16.1              | 6.9              | 18.3             | 66.4             | -7.2             | 8.9              | 5.8              | -0.2             | 52.6             |
| Construction workers, electricians and plumbers                          | 13.1  | 91.4             | -3.7             | 41.8              | 17.2             | 29.5             | 85.1             | -8.6             | 9.3              | 6.0              | -1.1             | 76.1             |
| Metal and machinery workers                                              | 24.6  | 32.4             | -1.2             | 18.5              | 18.0             | 12.5             | 35.6             | -2.2             | 0.7              | 4.2              | -0.7             | 15.9             |
| Craft workers                                                            | 26.9  | 30.5             | -0.4             | 1.5               | 4.0              | 14.5             | 26.2             | 12.3             | 1.8              | 4.6              | 13.0             | 25.1             |
| Chemical, wood and metal processing workers                              | 30.7  | 44.4             | -1.0             | 5.3               | 11.9             | 10.5             | 44.0             | 36.0             | -2.6             | 5.4              | 33.7             | 52.1             |
| Machine operators and assemblers                                         | 21.3  | 50.1             | -0.7             | 4.6               | 11.8             | 9.8              | 47.0             | 34.1             | 3.9              | 5.7              | 34.1             | 51.9             |
| Professional drivers                                                     | 6.02  | N/A              | N/A              | N/A               | N/A              | N/A              | N/A              | N/A              | N/A              | N/A              | N/A              | N/A              |
| Building caretakers, cleaners, assistant nurses and kitchen workers      | 27.2  | 58.2             | -0.8             | 15.7              | 9.6              | 15.4             | 47.7             | 24.0             | 3.0              | 5.6              | 24.8             | 54.9             |
| Unskilled transport, construction and manufacturing workers              | 30.9  | 62.6             | -1.6             | 14.3              | 14.7             | 12.6             | 60.7             | 32.4             | 7.4              | 5.4              | 34.0             | 63.4             |

Model 1: Adjusted for age.

<sup>1</sup>PRE – percentage (%) - the percentage of attenuation of HR (with professionals as reference) after adjustment for age, education and all physical work load factor.

<sup>2</sup>PRE – percentage explained (%) - the percentage of attenuation of HR (with professionals as reference) after adjustment for age, education and the physical work load factor in question;

<sup>3</sup>PRE – percentage explained (%) - the percentage of attenuation of HR (with professionals as reference) after adjustment for age, education and all psychosocial factors.

<sup>4</sup>PRE – percentage explained (%) - the percentage of attenuation of HR (with professionals as reference) after adjustment for age, education and the psychosocial factor in question.

<sup>5</sup>PRE – percentage explained (%) - the percentage of attenuation of HR (with professionals as reference) after adjustment for age, education and all physical psychosocial work-related factors.

<sup>6</sup>N/A: not applicable; <sup>7</sup> Minus indicates an increase in HR after adjustment
